# Supplementary material for: The public health impact of malaria vaccine RTS,S in malaria endemic Africa: country-specific predictions using 18 month follow-up Phase III data and simulation models
Source: Springer Nature journal article supplement (doi:10.1186/s12916-015-0408-2), 2015-07-28
Supplement: MOESM3 [file 9758968]

# **The public health impact of malaria vaccine RTS,S in malaria endemic Africa: country-specific predictions using 18 month follow-up Phase III data and simulation models**

Melissa A Penny<sup>\*1,2</sup>, Katya Galactionova<sup>1,2</sup>, Michael Tarantino<sup>1,2</sup>, Marcel Tanner<sup>1,2</sup>, Thomas A Smith<sup>1,2</sup>

<sup>1</sup> Swiss Tropical and Public Health Institute, Basel, Switzerland

<sup>2</sup> University of Basel, Basel, Switzerland

\* Corresponding Author:

Melissa A Penny

Department of Epidemiology and Public Health

Swiss Tropical and Public Health Institute

Socinstrasse 57, 4051 Basel, Switzerland

email: melissa.penny@unibas.ch

**Additional File 3: Supplementary Results 2- Tables associated with country-specific predictions of the public health impact of RTS,S**

| country                   | uncomplicated                | severe                 | hospitalisations      |
|---------------------------|------------------------------|------------------------|-----------------------|
| Angola                    | 5769415 (3577181-6951437)    | 98490 (51154-148988)   | 47403 (23227-73911)   |
| Benin                     | 2760487 (1835062-3293881)    | 41967 (8247-70704)     | 20338 (3661-33879)    |
| Botswana                  | 176370 (57181-265489)        | 3226 (1252-6098)       | 1532 (557-2946)       |
| Burkina Faso              | 5525943 (2727596-7058000)    | 53816 (-33444-147239)  | 26838 (-18386-71094)  |
| Burundi                   | 1714459 (1234846-2003572)    | 38052 (30253-51188)    | 18099 (14250-25617)   |
| Cameroon                  | 5573456 (3852291-6569889)    | 88757 (21037-144609)   | 42924 (9890-69693)    |
| Central African Republic  | 622972 (455808-727421)       | 10249 (1963-16813)     | 4955 (1022-8219)      |
| Chad                      | 1294503 (1047692-1430969)    | 27211 (15433-35322)    | 12992 (7267-18036)    |
| Comoros                   | 193723 (132832-227479)       | 3448 (1719-4966)       | 1657 (768-2521)       |
| Congo Democratic Republic | 14498191 (10482594-16738302) | 258365 (107341-368634) | 124216 (50082-186294) |
| Congo                     | 1179838 (801561-1393760)     | 20694 (10409-30149)    | 9954 (4757-15167)     |
| Coted Ivoire              | 6503296 (4351552-7788697)    | 94469 (7200-170510)    | 45908 (3393-82049)    |
| Djibouti                  | 6831 (3532-9003)             | 186 (89-259)           | 88 (38-129)           |
| Equatorial Guinea         | 81225 (55953-97250)          | 1176 (24-2167)         | 572 (17-1050)         |
| Eritrea                   | 256165 (202123-305701)       | 7671 (5392-10051)      | 3607 (2374-5175)      |
| Ethiopia                  | 1882396 (1644570-2108092)    | 55797 (44627-69579)    | 26264 (20088-35562)   |
| Gabon                     | 434867 (281216-521726)       | 6712 (2046-10634)      | 3252 (859-5225)       |
| The Gambia                | 426458 (323916-509571)       | 10321 (8261-13441)     | 4892 (3882-6696)      |
| Ghana                     | 7518203 (5083733-8870617)    | 130937 (62647-190602)  | 63010 (28137-96574)   |
| Guinea                    | 1807064 (1373759-2049431)    | 34807 (17577-47340)    | 16680 (8304-24158)    |
| Guinea Bissau             | 241970 (205346-279814)       | 6332 (5380-7734)       | 2996 (2519-3864)      |
| Kenya                     | 4100748 (3178275-4859818)    | 97030 (80438-123159)   | 46051 (38241-62256)   |
| Liberia                   | 1289261 (892152-1521788)     | 20883 (8205-31182)     | 10092 (3766-15498)    |
| Madagascar                | 4584185 (3399036-5266431)    | 81847 (30608-120173)   | 39321 (14016-58648)   |
| Malawi                    | 5592935 (3826948-6601774)    | 94493 (40609-138241)   | 45524 (18124-70149)   |
| Mali                      | 4161758 (2746785-4998651)    | 60254 (5610-108270)    | 29270 (2349-52009)    |
| Mauritania                | 221302 (195559-248163)       | 5581 (4515-6509)       | 2643 (2054-3302)      |
| Mozambique                | 5774429 (3663123-6923206)    | 91025 (30154-141352)   | 44019 (12516-70677)   |
| Namibia                   | 268622 (201162-311212)       | 5946 (4582-7887)       | 2830 (2136-3970)      |
| Niger                     | 4075102 (3066858-4622637)    | 79244 (44642-107626)   | 37936 (20919-54653)   |
| Nigeria                   | 23372156 (15902705-27681328) | 373201 (106512-589250) | 180411 (48083-285012) |
| Rwanda                    | 1102625 (724541-1403367)     | 29555 (18357-38897)    | 13950 (8223-19359)    |
| Sao Tome Principe         | 50287 (27973-64743)          | 839 (583-1417)         | 402 (249-694)         |
| Senegal                   | 2042086 (1638933-2435340)    | 52722 (42359-64749)    | 24945 (19701-32410)   |
| SierraLeone               | 1722666 (1176070-2027701)    | 28511 (10745-42290)    | 13763 (4889-21330)    |
| Somalia                   | 210122 (191713-234558)       | 6350 (5238-7514)       | 3011 (2377-3728)      |
| Sudan North               | 2670912 (2402333-2907909)    | 65273 (48624-75588)    | 30934 (21897-38534)   |
| Sudan South               | 846250 (737821-920416)       | 17934 (8919-23287)     | 8614 (4142-11302)     |
| Tanzania                  | 11926406 (8209080-13980381)  | 237765 (164073-334880) | 113555 (76590-167729) |
| Togo                      | 1573846 (1143858-1831348)    | 26795 (7535-41829)     | 12915 (3647-20355)    |
| Uganda                    | 10686701 (5127695-13451417)  | 150167 (63131-264121)  | 73269 (26194-131838)  |
| Zambia                    | 3266279 (2065913-3994017)    | 62617 (43335-93774)    | 29928 (20407-46040)   |
| Zimbabwe                  | 984940 (817953-1177970)      | 27359 (21669-34382)    | 12913 (9883-17442)    |

**Additional file 3: Table P1.** Cumulative total events (uncomplicated, severe, hospitalisations) averted (all ages) via EPI (6-12 weeks) immunisation schedule after 10 years.

| country                   | direct deaths       | all deaths            | direct DALYs              | DALYs                      |
|---------------------------|---------------------|-----------------------|---------------------------|----------------------------|
| Angola                    | 13690 (8009-21373)  | 37458 (18985-45595)   | 767275 (466916-1184815)   | 2018042 (1037787-2445405)  |
| Benin                     | 6553 (1376-10478)   | 20029 (10419-28387)   | 368735 (96754-581570)     | 1079388 (570258-1515906)   |
| Botswana                  | 387 (145-736)       | 885 (277-1384)        | 21588 (8348-40912)        | 47660 (14982-74086)        |
| Burkina Faso              | 10988 (-2806-23550) | 41884 (16696-67077)   | 625227 (-106108-1311293)  | 2258745 (922672-3584955)   |
| Burundi                   | 4744 (3512-6947)    | 11099 (6327-13917)    | 264309 (195988-381330)    | 597740 (344369-748069)     |
| Cameroon                  | 13624 (2983-21573)  | 40926 (21886-57700)   | 765913 (207811-1208860)   | 2205423 (1197053-3081709)  |
| Central African Republic  | 1583 (280-2590)     | 4774 (2603-6834)      | 89010 (20628-144717)      | 257294 (142292-365350)     |
| Chad                      | 3648 (1696-5304)    | 9430 (5797-12142)     | 203869 (103293-295187)    | 507998 (316263-648550)     |
| Comoros                   | 485 (228-745)       | 1334 (722-1693)       | 27167 (13787-41183)       | 71862 (39423-90335)        |
| Congo Democratic Republic | 37193 (13378-56755) | 104496 (58371-139822) | 2085256 (845043-3136449)  | 5630199 (3188971-7466102)  |
| Congo                     | 2886 (1541-4428)    | 7841 (4290-9778)      | 161655 (91395-245073)     | 422393 (234200-521478)     |
| Coted Ivoire              | 15303 (1620-25164)  | 48363 (25104-70375)   | 862310 (142428-1411674)   | 2606672 (1374176-3759366)  |
| Djibouti                  | 21 (8-33)           | 44 (21-62)            | 1173 (458-1779)           | 2351 (1128-3318)           |
| Equatorial Guinea         | 193 (8-327)         | 618 (325-910)         | 10902 (1167-18345)        | 33295 (17803-48615)        |
| Eritrea                   | 844 (496-1180)      | 1765 (1287-2451)      | 46986 (27741-65470)       | 95204 (68952-130203)       |
| Ethiopia                  | 6253 (4278-8292)    | 13235 (10121-16903)   | 347795 (238543-456214)    | 713363 (541156-911912)     |
| Gabon                     | 1010 (353-1593)     | 2997 (1561-4108)      | 56768 (22113-88548)       | 161508 (85410-219248)      |
| The Gambia                | 1248 (878-1789)     | 2773 (1640-3517)      | 69416 (48697-97782)       | 149298 (89191-189202)      |
| Ghana                     | 18506 (8869-28479)  | 51121 (27536-65323)   | 1037050 (533734-1576241)  | 2754010 (1504374-3485018)  |
| Guinea                    | 4827 (2095-7188)    | 12959 (7611-16838)    | 270117 (128612-396319)    | 698125 (415352-898960)     |
| Guinea Bissau             | 754 (563-1029)      | 1657 (1070-2060)      | 41899 (31266-55897)       | 89225 (58257-110318)       |
| Kenya                     | 11848 (8915-16896)  | 27624 (16547-35063)   | 660719 (496575-922573)    | 1488625 (901338-1887970)   |
| Liberia                   | 3003 (1486-4610)    | 8441 (4794-11061)     | 168466 (88317-255883)     | 454710 (261594-589712)     |
| Madagascar                | 11903 (3386-18514)  | 34073 (18983-46698)   | 668019 (224817-1032934)   | 1836269 (1037844-2495317)  |
| Malawi                    | 13601 (5990-21096)  | 38177 (20877-49599)   | 762790 (364934-1167862)   | 2056891 (1140322-2646191)  |
| Mali                      | 9741 (1199-15949)   | 30741 (15769-44604)   | 548921 (99920-888396)     | 1656936 (863564-2382576)   |
| Mauritania                | 674 (464-906)       | 1563 (1045-1952)      | 37570 (26843-49237)       | 84194 (57022-105067)       |
| Mozambique                | 13660 (4528-21670)  | 40530 (20375-55185)   | 767774 (288675-1202648)   | 2184081 (1115992-2946041)  |
| Namibia                   | 749 (541-1088)      | 1793 (1052-2193)      | 41787 (31457-59661)       | 96559 (57283-118032)       |
| Niger                     | 10813 (5562-16079)  | 28332 (16716-35335)   | 604643 (334069-884760)    | 1526183 (911607-1885554)   |
| Nigeria                   | 56390 (16213-88724) | 166835 (89295-230306) | 3168616 (1061306-4919068) | 8989980 (4882893-12295519) |
| Rwanda                    | 3393 (1796-4841)    | 7189 (4100-9736)      | 188750 (100040-263378)    | 387450 (222998-523322)     |
| Sao Tome Principe         | 104 (68-173)        | 257 (127-351)         | 5841 (3791-9589)          | 13814 (6879-18748)         |
| Senegal                   | 6254 (4397-8618)    | 13768 (8629-17524)    | 347838 (244383-468826)    | 741556 (469845-938873)     |
| SierraLeone               | 4173 (1626-6441)    | 11950 (6498-16000)    | 234151 (100561-357072)    | 643800 (355071-853806)     |
| Somalia                   | 730 (559-905)       | 1540 (1215-1941)      | 40439 (30728-50391)       | 82815 (66205-104540)       |
| Sudan North               | 8015 (4899-10785)   | 19120 (12899-23961)   | 447210 (291714-589252)    | 1030449 (704158-1288898)   |
| Sudan South               | 2437 (1310-3429)    | 6416 (4049-8470)      | 136273 (77288-190146)     | 345692 (220706-453522)     |
| Tanzania                  | 30968 (21584-47072) | 77284 (42663-94889)   | 1729963 (1240941-2592490) | 4163244 (2324660-5097922)  |
| Togo                      | 4022 (879-6453)     | 11811 (6510-16589)    | 225896 (61463-360415)     | 636453 (355875-886276)     |
| Uganda                    | 21399 (9672-34981)  | 63299 (27935-86446)   | 1203515 (580564-1942708)  | 3410240 (1546369-4636575)  |
| Zambia                    | 8129 (5671-12846)   | 20233 (10510-25452)   | 454263 (320266-709167)    | 1089926 (572450-1364822)   |
| Zimbabwe                  | 3142 (2148-4102)    | 6809 (4583-9079)      | 174857 (119687-227565)    | 366925 (249839-484132)     |

**Additional file 3: Table P2.** Cumulative total events averted (deaths and DALYs) via EPI (6-12 weeks) immunisation schedule after 10 years. Events include direct DALYs which are DALYs calculated from direct malaria deaths rather than all deaths.

| country                   | uncomplicated                | severe                 | hospitalisations       |
|---------------------------|------------------------------|------------------------|------------------------|
| Angola                    | 8352964 (5146713-10005777)   | 148960 (104354-218074) | 71551 (49869-106487)   |
| Benin                     | 4006184 (2631675-4759999)    | 68145 (33108-100689)   | 32808 (16900-50240)    |
| Botswana                  | 276213 (91201-411346)        | 4987 (1851-9024)       | 2385 (844-4389)        |
| Burkina Faso              | 8065424 (3979542-10254814)   | 99791 (3159-198091)    | 48542 (2265-94813)     |
| Burundi                   | 2522266 (1815161-2928760)    | 57267 (45194-75533)    | 27322 (21356-36771)    |
| Cameroon                  | 8086042 (5517259-9493723)    | 143840 (74809-207548)  | 69176 (38069-103354)   |
| Central African Republic  | 906273 (654195-1054102)      | 16978 (8671-23982)     | 8159 (4383-11917)      |
| Chad                      | 1891218 (1516205-2081332)    | 42370 (31793-54334)    | 20239 (15228-26546)    |
| Comoros                   | 281676 (191231-329076)       | 5342 (3642-7528)       | 2562 (1765-3701)       |
| Congo Democratic Republic | 21172818 (15128766-24349309) | 410092 (261698-566322) | 196661 (129591-279782) |
| Congo                     | 1704602 (1146354-2003584)    | 31412 (21239-44881)    | 15084 (10292-22081)    |
| Coted Ivoire              | 9435714 (6233716-11253879)   | 156968 (66070-235235)  | 75646 (34530-117859)   |
| Djibouti                  | 11306 (5859-14800)           | 311 (143-429)          | 147 (65-210)           |
| Equatorial Guinea         | 118035 (80222-140666)        | 1990 (799-2970)        | 959 (422-1491)         |
| Eritrea                   | 400732 (321439-471057)       | 12190 (8436-15501)     | 5758 (3857-7643)       |
| Ethiopia                  | 2910729 (2562121-3240818)    | 87701 (67976-106324)   | 41455 (31635-51853)    |
| Gabon                     | 628434 (401600-750925)       | 10488 (5516-15667)     | 5053 (2764-7770)       |
| The Gambia                | 619008 (471075-733154)       | 15276 (11506-19570)    | 7273 (5414-9508)       |
| Ghana                     | 10873668 (7278972-12767407)  | 201038 (132766-286969) | 96527 (64755-141315)   |
| Guinea                    | 2625668 (1976099-2965468)    | 54226 (38037-72635)    | 25962 (18482-35717)    |
| Guinea Bissau             | 353261 (300461-404813)       | 9451 (7590-11453)      | 4492 (3598-5563)       |
| Kenya                     | 6186137 (4781685-7269452)    | 150638 (119390-189757) | 71688 (56466-92307)    |
| Liberia                   | 1859506 (1269698-2185483)    | 31624 (18199-46113)    | 15232 (9150-22816)     |
| Madagascar                | 6785631 (4957933-7774698)    | 133845 (83537-182203)  | 64113 (41008-89983)    |
| Malawi                    | 8113418 (5488021-9529073)    | 146451 (91191-210129)  | 70358 (45011-103890)   |
| Mali                      | 6061046 (3952782-7248290)    | 100221 (43115-150282)  | 48288 (22290-75286)    |
| Mauritania                | 342215 (305340-381133)       | 8907 (7758-10468)      | 4231 (3656-5078)       |
| Mozambique                | 8376375 (5266502-9996988)    | 144135 (81142-212707)  | 69337 (39989-105280)   |
| Namibia                   | 407811 (304402-470008)       | 9271 (7622-12088)      | 4424 (3628-5893)       |
| Niger                     | 5937908 (4429816-6704386)    | 122260 (90255-163670)  | 58525 (43302-80418)    |
| Nigeria                   | 33869041 (22753259-39941274) | 594676 (319953-864699) | 286023 (161763-429867) |
| Rwanda                    | 1678527 (1121284-2110231)    | 45702 (27532-60037)    | 21677 (12836-29306)    |
| Sao Tome Principe         | 72201 (40412-92016)          | 1186 (787-1905)        | 570 (351-926)          |
| Senegal                   | 3001542 (2441627-3538093)    | 79224 (60520-96714)    | 37645 (28643-46941)    |
| SierraLeone               | 2490108 (1678854-2918997)    | 44356 (26029-63955)    | 21330 (13105-31668)    |
| Somalia                   | 319122 (293668-351685)       | 9757 (7980-11629)      | 4623 (3687-5665)       |
| Sudan North               | 4143186 (3756007-4486189)    | 105451 (90290-123910)  | 50089 (43150-60181)    |
| Sudan South               | 1280774 (1093515-1395845)    | 29217 (20198-37447)    | 13975 (9606-18108)     |
| Tanzania                  | 17378192 (11918115-20217504) | 358291 (283686-492387) | 171352 (132415-239575) |
| Togo                      | 2287138 (1640815-2650330)    | 43535 (24398-61031)    | 20896 (12290-30301)    |
| Uganda                    | 15515888 (7444158-19429402)  | 214312 (121837-358983) | 103846 (55812-174170)  |
| Zambia                    | 4728905 (2983205-5736227)    | 92979 (67981-134812)   | 44511 (31655-65694)    |
| Zimbabwe                  | 1487357 (1251525-1752816)    | 42175 (32122-52163)    | 19987 (15095-25415)    |

**Additional file 3: Table P3.** Cumulative total events (uncomplicated, severe, hospitalisations) averted (all ages) via EPI with booster immunisation schedule after 10 years.

| country                   | direct deaths        | all deaths             | direct DALYs              | DALYs                       |
|---------------------------|----------------------|------------------------|---------------------------|-----------------------------|
| Angola                    | 19792 (12777-29905)  | 47795 (25728-56277)    | 1103163 (717020-1653706)  | 2572196 (1396487-3041597)   |
| Benin                     | 9863 (5105-15400)    | 25580 (14394-32995)    | 550906 (295812-852936)    | 1377317 (781419-1761285)    |
| Botswana                  | 583 (201-1033)       | 1221 (378-1817)        | 32402 (11222-57410)       | 65721 (20485-98328)         |
| Burkina Faso              | 17500 (3763-31290)   | 53021 (22948-77314)    | 984112 (245408-1726789)   | 2857324 (1254471-4129957)   |
| Burundi                   | 6865 (4799-9748)     | 14616 (8968-17988)     | 381000 (264107-535952)    | 786190 (483343-967508)      |
| Cameroon                  | 20498 (10992-31803)  | 52401 (30310-66978)    | 1144165 (634777-1760305)  | 2821283 (1632424-3575751)   |
| Central African Republic  | 2414 (1289-3773)     | 6146 (3640-7900)       | 134735 (74541-208623)     | 330956 (195897-422209)      |
| Chad                      | 5396 (3939-7614)     | 12308 (8095-14612)     | 299989 (222807-419235)    | 662392 (434442-784467)      |
| Comoros                   | 713 (490-1060)       | 1716 (1000-2030)       | 39697 (27838-58532)       | 92358 (54271-109398)        |
| Congo Democratic Republic | 55540 (35275-82217)  | 135221 (81503-164321)  | 3095015 (2013700-4554444) | 7278850 (4384932-8771828)   |
| Congo                     | 4174 (2939-6244)     | 10009 (5840-11740)     | 232536 (164471-344768)    | 538590 (316604-634963)      |
| Coted Ivoire              | 23301 (10740-37435)  | 61738 (34734-81350)    | 1302481 (628416-2071198)  | 3324678 (1872455-4343431)   |
| Djibouti                  | 34 (14-49)           | 65 (32-94)             | 1890 (764-2709)           | 3513 (1716-5047)            |
| Equatorial Guinea         | 297 (129-484)        | 791 (449-1047)         | 16625 (7613-26768)        | 42583 (24162-55941)         |
| Eritrea                   | 1310 (806-1810)      | 2523 (1862-3478)       | 72569 (45274-99231)       | 135845 (101559-185379)      |
| Ethiopia                  | 9568 (6729-12572)    | 18651 (14643-23600)    | 529964 (377553-689733)    | 1003781 (799136-1270607)    |
| Gabon                     | 1487 (856-2278)      | 3807 (2115-4821)       | 83002 (49152-126120)      | 204907 (114809-257163)      |
| The Gambia                | 1776 (1234-2462)     | 3624 (2304-4639)       | 98439 (68228-135043)      | 194926 (123687-249638)      |
| Ghana                     | 26971 (18371-40366)  | 65328 (37735-77186)    | 1502893 (1043067-2229255) | 3515804 (2046599-4171657)   |
| Guinea                    | 7116 (4924-10309)    | 16746 (10550-19774)    | 396021 (279463-567486)    | 901250 (567095-1061502)     |
| Guinea Bissau             | 1084 (808-1430)      | 2188 (1507-2733)       | 60037 (44889-78170)       | 117703 (81343-147236)       |
| Kenya                     | 17750 (13066-24185)  | 37464 (23616-47406)    | 985198 (715788-1326721)   | 2016060 (1280732-2536483)   |
| Liberia                   | 4333 (2824-6529)     | 10712 (6429-13100)     | 241672 (160423-360916)    | 576463 (348240-698043)      |
| Madagascar                | 18224 (11047-27365)  | 44738 (26918-55185)    | 1016071 (633432-1513202)  | 2408909 (1446881-2947788)   |
| Malawi                    | 19944 (13002-30010)  | 48858 (28643-58541)    | 1111948 (740725-1657652)  | 2629720 (1552898-3122457)   |
| Mali                      | 14865 (6971-23741)   | 39354 (21911-51764)    | 831035 (407768-1313978)   | 2119364 (1185269-2763738)   |
| Mauritania                | 1039 (828-1346)      | 2178 (1526-2691)       | 57641 (46356-73595)       | 117212 (82851-144484)       |
| Mozambique                | 20302 (11887-31040)  | 51733 (28022-64774)    | 1133420 (682852-1717538)  | 2785159 (1522456-3456871)   |
| Namibia                   | 1124 (820-1584)      | 2433 (1533-2961)       | 62424 (45058-87027)       | 130904 (82737-159322)       |
| Niger                     | 15843 (11678-22914)  | 36699 (23221-43107)    | 881480 (660773-1261253)   | 1974899 (1248591-2314220)   |
| Nigeria                   | 83994 (47446-128206) | 213086 (123000-268507) | 4687761 (2729914-7106286) | 11471635 (6673020-14329592) |
| Rwanda                    | 5080 (2752-6947)     | 9921 (5903-13761)      | 281368 (153931-381725)    | 533813 (320040-736448)      |
| Sao Tome Principe         | 144 (85-230)         | 324 (162-422)          | 8015 (4704-12699)         | 17424 (8768-22725)          |
| Senegal                   | 9061 (6382-12004)    | 18298 (12161-23490)    | 502090 (356605-656917)    | 984313 (659094-1263683)     |
| SierraLeone               | 6126 (3799-9212)     | 15237 (8879-18776)     | 341630 (216931-509135)    | 820103 (481459-1001549)     |
| Somalia                   | 1086 (823-1351)      | 2112 (1795-2593)       | 59991 (45569-74581)       | 113493 (97342-139727)       |
| Sudan North               | 12488 (9343-16309)   | 26711 (18684-32716)    | 693373 (530604-892429)    | 1437770 (1015190-1756424)   |
| Sudan South               | 3760 (2684-5143)     | 8654 (5989-10297)      | 209022 (151793-284225)    | 465772 (323697-551369)      |
| Tanzania                  | 44732 (31119-65615)  | 100179 (59252-120301)  | 2487107 (1737253-3615410) | 5390383 (3210904-6457823)   |
| Togo                      | 6073 (3371-9372)     | 15205 (9003-19205)     | 338698 (194107-518242)    | 818625 (484285-1025623)     |
| Uganda                    | 30079 (15583-46951)  | 79469 (34944-107876)   | 1682856 (868406-2594935)  | 4276464 (1890674-5769869)   |
| Zambia                    | 11597 (7518-17661)   | 25993 (14290-31514)    | 645042 (420396-974559)    | 1398598 (774554-1692478)    |
| Zimbabwe                  | 4699 (3264-6162)     | 9343 (6477-12403)      | 260397 (182826-338437)    | 502750 (352081-662350)      |

**Additional file 3: Table P4.** Cumulative total events averted (deaths and DALYs) via EPI with booster immunisation schedule after 10 years. Events include direct DALYs which are DALYs calculated from direct malaria deaths rather than all deaths.

| country                   | uncomplicated                | severe                 | hospitalisations       |
|---------------------------|------------------------------|------------------------|------------------------|
| Angola                    | 4634476 (2841787-5593410)    | 91708 (66321-130143)   | 43952 (32565-63960)    |
| Benin                     | 2188371 (1439850-2622555)    | 44959 (28911-62361)    | 21536 (13384-31377)    |
| Botswana                  | 145364 (46915-217348)        | 2664 (914-4729)        | 1268 (415-2256)        |
| Burkina Faso              | 4286288 (2109527-5526543)    | 74117 (28595-114948)   | 35668 (11606-60099)    |
| Burundi                   | 1404804 (1001666-1625662)    | 33631 (24346-44271)    | 16021 (11149-22168)    |
| Cameroon                  | 4424719 (3025938-5236176)    | 94631 (63278-128411)   | 45277 (29290-64764)    |
| Central African Republic  | 495502 (360618-580913)       | 11357 (7529-15160)     | 5426 (3460-7624)       |
| Chad                      | 1047448 (839559-1157099)     | 26282 (21591-32821)    | 12514 (10214-16654)    |
| Comoros                   | 155479 (105335-182881)       | 3341 (2603-4530)       | 1598 (1234-2269)       |
| Congo Democratic Republic | 11607704 (8301998-13425745)  | 260633 (194858-343959) | 124503 (91549-173659)  |
| Congo                     | 947494 (634992-1121693)      | 19431 (14983-26876)    | 9309 (7165-13293)      |
| Coted Ivoire              | 5134150 (3402625-6182886)    | 105857 (63972-147325)  | 50700 (29223-74555)    |
| Djibouti                  | 5721 (2994-7475)             | 163 (69-228)           | 77 (32-113)            |
| Equatorial Guinea         | 64071 (43755-77141)          | 1358 (805-1876)        | 650 (365-949)          |
| Eritrea                   | 215066 (171818-254736)       | 6781 (4324-8885)       | 3196 (1947-4319)       |
| Ethiopia                  | 1574544 (1395817-1767233)    | 49355 (35705-61851)    | 23298 (16222-30064)    |
| Gabon                     | 345433 (220510-416348)       | 6729 (4479-9562)       | 3229 (2104-4781)       |
| The Gambia                | 352385 (265186-416391)       | 9009 (6206-11560)      | 4284 (2839-5808)       |
| Ghana                     | 6027118 (4024078-7127490)    | 125788 (95881-172920)  | 60228 (45522-86016)    |
| Guinea                    | 1454242 (1093386-1650880)    | 34026 (26915-43977)    | 16237 (12730-22234)    |
| Guinea Bissau             | 200359 (169191-229046)       | 5582 (4157-6783)       | 2648 (1905-3398)       |
| Kenya                     | 3369802 (2586114-3963083)    | 87434 (61790-109521)   | 41510 (28390-54875)    |
| Liberia                   | 1030190 (701588-1220724)     | 19596 (13520-27598)    | 9416 (6515-13686)      |
| Madagascar                | 3668772 (2700566-4217859)    | 85659 (63216-111500)   | 40840 (29390-56432)    |
| Malawi                    | 4478154 (3021417-5299574)    | 91957 (67256-126738)   | 44049 (31978-62949)    |
| Mali                      | 3289186 (2151970-3969945)    | 67262 (40962-93825)    | 32215 (18754-47476)    |
| Mauritania                | 182238 (163130-202391)       | 5095 (4012-6167)       | 2414 (1843-2979)       |
| Mozambique                | 4594014 (2889125-5527098)    | 93082 (64845-130411)   | 44594 (30250-65069)    |
| Namibia                   | 219426 (162617-251793)       | 5350 (4080-6908)       | 2547 (1863-3476)       |
| Niger                     | 3291460 (2446379-3735140)    | 75377 (61661-97960)    | 35990 (29429-49339)    |
| Nigeria                   | 18590070 (12491423-22101239) | 385713 (260921-530848) | 184719 (121949-265437) |
| Rwanda                    | 920494 (611165-1160633)      | 25887 (14187-34750)    | 12249 (6642-16659)     |
| Sao Tome Principe         | 41088 (22749-52655)          | 681 (423-1059)         | 327 (193-524)          |
| Senegal                   | 1692122 (1375154-1996742)    | 46520 (32622-57857)    | 22062 (14976-28461)    |
| SierraLeone               | 1373993 (924726-1623164)     | 28190 (19996-38827)    | 13510 (9458-19301)     |
| Somalia                   | 176533 (162392-195960)       | 5607 (4330-6857)       | 2663 (1938-3238)       |
| Sudan North               | 2192332 (1996901-2366395)    | 60762 (49485-72500)    | 28785 (22644-35089)    |
| Sudan South               | 688675 (599325-754716)       | 18011 (13892-22409)    | 8597 (6632-10966)      |
| Tanzania                  | 9698677 (6599986-11359883)   | 215134 (165375-292010) | 102701 (76072-145881)  |
| Togo                      | 1253275 (902726-1462705)     | 28574 (19855-37963)    | 13644 (9176-19241)     |
| Uganda                    | 8486734 (4007514-10798534)   | 126997 (73061-200180)  | 61501 (37186-100211)   |
| Zambia                    | 2657856 (1661738-3247443)    | 55570 (39079-79368)    | 26562 (18218-39283)    |
| Zimbabwe                  | 819696 (689881-971513)       | 24246 (17000-31153)    | 11466 (7889-15061)     |

**Additional file 3: Table P5.** Cumulative total events (uncomplicated, severe, hospitalisations) averted (all ages) via Extended routine (6-9 months) immunisation schedule after 10 years.



| country                   | direct deaths       | all deaths            | direct DALYs              | DALYs                     |
|---------------------------|---------------------|-----------------------|---------------------------|---------------------------|
| Angola                    | 10944 (6886-17670)  | 24414 (13266-30567)   | 612058 (378135-973863)    | 1316047 (721270-1655462)  |
| Benin                     | 5606 (2746-9246)    | 13186 (7127-17377)    | 314096 (163253-508008)    | 711128 (386576-940618)    |
| Botswana                  | 294 (86-544)        | 581 (173-877)         | 16402 (4930-30183)        | 31311 (9418-47458)        |
| Burkina Faso              | 10064 (1973-18363)  | 26960 (12750-38371)   | 568042 (139960-1011478)   | 1455814 (689790-2051991)  |
| Burundi                   | 3776 (2376-5640)    | 7528 (4253-9627)      | 210043 (133766-309656)    | 405471 (231523-519527)    |
| Cameroon                  | 11686 (5839-19003)  | 27103 (14777-35554)   | 654130 (346829-1043119)   | 1461488 (801538-1924707)  |
| Central African Republic  | 1394 (698-2236)     | 3210 (1807-4148)      | 78008 (41687-122789)      | 173104 (97897-224706)     |
| Chad                      | 3048 (2135-4566)    | 6419 (3846-7831)      | 169855 (122354-249777)    | 345876 (208979-423823)    |
| Comoros                   | 399 (268-632)       | 883 (493-1114)        | 22282 (15053-34753)       | 47596 (26771-60300)       |
| Congo Democratic Republic | 31335 (19053-49353) | 69789 (39254-88697)   | 1750723 (1106733-2707277) | 3762174 (2131214-4801580) |
| Congo                     | 2324 (1560-3701)    | 5144 (2904-6470)      | 129844 (87751-203676)     | 277215 (157865-350264)    |
| Coted Ivoire              | 13346 (5612-22292)  | 31881 (17060-42691)   | 748187 (341569-1224003)   | 1719638 (924720-2311213)  |
| Djibouti                  | 17 (6-26)           | 31 (14-47)            | 951 (336-1417)            | 1673 (764-2496)           |
| Equatorial Guinea         | 171 (66-288)        | 410 (219-553)         | 9613 (4095-15778)         | 22106 (11872-29921)       |
| Eritrea                   | 698 (377-1003)      | 1271 (883-1906)       | 38744 (21030-55267)       | 68507 (47166-101067)      |
| Ethiopia                  | 5150 (3297-7715)    | 9448 (6928-12642)     | 285711 (183450-409728)    | 509062 (369160-670896)    |
| Gabon                     | 832 (473-1367)      | 1946 (1075-2535)      | 46600 (27481-75237)       | 104920 (58370-137132)     |
| The Gambia                | 993 (616-1444)      | 1911 (1095-2494)      | 55152 (34066-79181)       | 102885 (59675-134670)     |
| Ghana                     | 15094 (10130-24065) | 33637 (18755-42598)   | 843547 (568787-1323560)   | 1812993 (1019086-2306007) |
| Guinea                    | 4024 (2676-6191)    | 8712 (5055-10870)     | 224502 (154004-339369)    | 469502 (274603-588357)    |
| Guinea Bissau             | 607 (409-843)       | 1155 (719-1483)       | 33681 (22627-46090)       | 62197 (39207-79195)       |
| Kenya                     | 9641 (6290-13918)   | 19039 (11435-24901)   | 536450 (350676-760724)    | 1026013 (621814-1328948)  |
| Liberia                   | 2394 (1573-3863)    | 5460 (3199-6921)      | 133961 (89786-212782)     | 294316 (173909-374398)    |
| Madagascar                | 10270 (5889-16209)  | 22957 (12902-29179)   | 574070 (345635-887685)    | 1237922 (700439-1580238)  |
| Malawi                    | 11150 (7234-17900)  | 25107 (14131-31913)   | 623550 (415600-984593)    | 1353507 (767805-1727409)  |
| Mali                      | 8481 (3702-14186)   | 20261 (10826-27000)   | 475564 (224126-779185)    | 1092972 (586895-1461778)  |
| Mauritania                | 556 (394-760)       | 1088 (728-1381)       | 30904 (21984-41404)       | 58626 (39615-73545)       |
| Mozambique                | 11430 (6584-18712)  | 26547 (14256-34431)   | 640092 (383452-1029308)   | 1431538 (773857-1863765)  |
| Namibia                   | 603 (398-895)       | 1217 (709-1514)       | 33556 (22360-49081)       | 65542 (38572-81800)       |
| Niger                     | 8879 (6250-13622)   | 19018 (11073-23389)   | 495279 (350116-747375)    | 1024836 (601898-1266188)  |
| Nigeria                   | 47545 (25765-77356) | 109882 (60637-143111) | 2661370 (1511749-4250696) | 5924948 (3290493-7745688) |
| Rwanda                    | 2748 (1311-3896)    | 5081 (2838-7382)      | 152590 (72996-215188)     | 273766 (154932-394054)    |
| Sao Tome Principe         | 77 (38-133)         | 164 (81-223)          | 4304 (2150-7345)          | 8824 (4403-12010)         |
| Senegal                   | 5044 (3193-7036)    | 9603 (5890-12771)     | 280124 (176891-384604)    | 517243 (320904-681813)    |
| SierraLeone               | 3440 (2080-5523)    | 7836 (4390-10070)     | 192395 (120307-303661)    | 422386 (238378-544927)    |
| Somalia                   | 595 (412-784)       | 1099 (911-1355)       | 32930 (23086-42901)       | 59134 (48970-73207)       |
| Sudan North               | 6686 (4818-9186)    | 13293 (9008-16381)    | 372030 (270046-500766)    | 716464 (490745-882933)    |
| Sudan South               | 2088 (1579-2942)    | 4430 (3079-5225)      | 116378 (90719-162328)     | 238719 (166732-280680)    |
| Tanzania                  | 24772 (15767-38533) | 51678 (28893-63473)   | 1381257 (887950-2118386)  | 2784769 (1572254-3427670) |
| Togo                      | 3481 (1774-5588)    | 7912 (4352-10314)     | 194622 (105343-306225)    | 426610 (236101-558452)    |
| Uganda                    | 15632 (4995-26425)  | 38577 (12618-53008)   | 879543 (292259-1468715)   | 2080384 (691138-2835765)  |
| Zambia                    | 6405 (3808-10335)   | 13406 (7159-16852)    | 357392 (215151-569499)    | 722486 (389801-908663)    |
| Zimbabwe                  | 2569 (1617-3512)    | 4813 (3240-6787)      | 142627 (89954-194020)     | 259347 (176503-361042)    |

**Additional file 3: Table P6.** Cumulative total events averted (deaths and DALYs) via Extended routine (6-9 months) immunisation schedule after 10 years. Events include direct DALYs which are DALYs calculated from direct malaria deaths rather than all deaths.

| country                   | uncomplicated                | severe                 | hospitalisations       |
|---------------------------|------------------------------|------------------------|------------------------|
| Angola                    | 6897229 (4268039-8270251)    | 132302 (96798-183520)  | 63278 (45292-90983)    |
| Benin                     | 3293316 (2180416-3911770)    | 65873 (50845-90271)    | 31451 (23844-45486)    |
| Botswana                  | 225882 (74437-336029)        | 4012 (1376-6810)       | 1917 (649-3454)        |
| Burkina Faso              | 6576317 (3288540-8359005)    | 110631 (63531-168334)  | 52995 (28273-86654)    |
| Burundi                   | 2093480 (1507086-2415764)    | 49019 (34091-63244)    | 23339 (16064-31051)    |
| Cameroon                  | 6649579 (4572740-7804473)    | 138614 (109749-186412) | 66119 (51478-93673)    |
| Central African Republic  | 746930 (543982-868828)       | 16720 (13128-22216)    | 7963 (6074-10989)      |
| Chad                      | 1566859 (1259421-1725017)    | 38446 (33462-47589)    | 18274 (15565-23392)    |
| Comoros                   | 232459 (158667-271725)       | 4861 (3888-6495)       | 2320 (1800-3226)       |
| Congo Democratic Republic | 17451952 (12542084-20066002) | 382101 (323416-498867) | 182080 (148675-248401) |
| Congo                     | 1407468 (950255-1656152)     | 28038 (22254-38041)    | 13399 (10281-18909)    |
| Coted Ivoire              | 7744033 (5159522-9232029)    | 155665 (115481-214524) | 74291 (53778-108455)   |
| Djibouti                  | 9231 (4839-11994)            | 258 (106-362)          | 122 (49-172)           |
| Equatorial Guinea         | 96888 (66455-115370)         | 2006 (1475-2748)       | 956 (683-1389)         |
| Eritrea                   | 333128 (267899-388789)       | 10339 (6452-13503)     | 4877 (2965-6509)       |
| Ethiopia                  | 2419848 (2139440-2674228)    | 74530 (52563-92865)    | 35187 (24109-44962)    |
| Gabon                     | 516406 (331715-617533)       | 9749 (7581-13576)      | 4664 (3590-6832)       |
| The Gambia                | 518179 (393930-610219)       | 13019 (8607-16405)     | 6190 (4041-8058)       |
| Ghana                     | 8973448 (6037768-10544759)   | 182055 (144712-245966) | 86957 (66963-122438)   |
| Guinea                    | 2171183 (1639414-2453027)    | 49605 (42859-63366)    | 23620 (19722-31357)    |
| Guinea Bissau             | 295807 (251359-336760)       | 8100 (5781-9789)       | 3843 (2699-4738)       |
| Kenya                     | 5121202 (3962689-5979922)    | 130129 (88555-163299)  | 61776 (41301-78352)    |
| Liberia                   | 1531080 (1047436-1802164)    | 28192 (22087-38818)    | 13501 (10583-19443)    |
| Madagascar                | 5584156 (4117140-6387247)    | 127254 (108158-163943) | 60538 (50242-81338)    |
| Malawi                    | 6693900 (4548123-7867404)    | 133657 (108189-181143) | 63847 (49899-90423)    |
| Mali                      | 4976202 (3274294-5946509)    | 99161 (74204-136913)   | 47330 (34541-69167)    |
| Mauritania                | 282040 (252899-311461)       | 7715 (5831-9339)       | 3655 (2695-4479)       |
| Mozambique                | 6892340 (4367744-8226430)    | 135639 (105133-186924) | 64805 (49140-93679)    |
| Namibia                   | 335405 (250561-383813)       | 7976 (5821-10128)      | 3796 (2735-4978)       |
| Niger                     | 4916384 (3674017-5554781)    | 109933 (93591-140871)  | 52378 (42813-69624)    |
| Nigeria                   | 27876000 (18851159-32877242) | 562945 (448753-764371) | 268766 (211628-383996) |
| Rwanda                    | 1398898 (938079-1748370)     | 38737 (20670-52155)    | 18357 (9626-24835)     |
| Sao Tome Principe         | 60088 (33682-76598)          | 959 (620-1454)         | 460 (280-738)          |
| Senegal                   | 2511406 (2049716-2943032)    | 67881 (45759-84085)    | 32203 (21350-40270)    |
| SierraLeone               | 2050035 (1389113-2404936)    | 40875 (33363-55345)    | 19530 (15384-27744)    |
| Somalia                   | 267606 (247161-293744)       | 8325 (6154-10209)      | 3938 (2845-4909)       |
| Sudan North               | 3410550 (3122251-3657796)    | 92496 (72401-110555)   | 43797 (33299-53261)    |
| Sudan South               | 1059313 (910080-1157975)     | 26992 (23055-33755)    | 12837 (10827-16169)    |
| Tanzania                  | 14422295 (9908764-16802783)  | 312192 (235048-414563) | 148860 (110170-203263) |
| Togo                      | 1883883 (1362010-2181854)    | 41944 (34105-55152)    | 19974 (15846-27553)    |
| Uganda                    | 12709604 (6116324-16021613)  | 178618 (112275-271922) | 86304 (52247-137402)   |
| Zambia                    | 3930169 (2482909-4774229)    | 80089 (56388-111653)   | 38244 (26231-54528)    |
| Zimbabwe                  | 1239629 (1046512-1452202)    | 36052 (24506-46041)    | 17056 (11336-22132)    |

**Additional file 3: Table P7.** Cumulative total events (uncomplicated, severe, hospitalisations) averted (all ages) via Extended routine with booster immunisation schedule after 10 years.



| country                   | direct deaths        | all deaths            | direct DALYs              | DALYs                     |
|---------------------------|----------------------|-----------------------|---------------------------|---------------------------|
| Angola                    | 15483 (10535-23505)  | 32109 (19014-38907)   | 861397 (590291-1285013)   | 1727708 (1026524-2096128) |
| Benin                     | 8078 (5807-12365)    | 17409 (10655-21598)   | 449625 (324803-674906)    | 936948 (576643-1168208)   |
| Botswana                  | 427 (138-724)        | 804 (260-1211)        | 23729 (7584-40878)        | 43295 (14048-64908)       |
| Burkina Faso              | 14834 (8201-24644)   | 35432 (17895-47384)   | 829271 (469335-1347262)   | 1908842 (954694-2536579)  |
| Burundi                   | 5365 (3524-7602)     | 10122 (6302-12715)    | 297301 (194554-414871)    | 544203 (341720-683793)    |
| Cameroon                  | 16835 (12303-25417)  | 35850 (22212-44160)   | 936395 (687583-1386692)   | 1929194 (1202359-2388876) |
| Central African Republic  | 2018 (1529-2993)     | 4261 (2717-5184)      | 112180 (85180-163464)     | 229277 (147011-280605)    |
| Chad                      | 4367 (3401-6161)     | 8596 (5824-10199)     | 242174 (191146-335095)    | 462325 (315150-549020)    |
| Comoros                   | 569 (409-847)        | 1170 (729-1402)       | 31636 (22883-46246)       | 62944 (39417-75868)       |
| Congo Democratic Republic | 45088 (33448-66437)  | 92964 (59114-111245)  | 2505146 (1868562-3621759) | 5001597 (3198887-6019213) |
| Congo                     | 3288 (2373-4923)     | 6771 (4233-8135)      | 182817 (132868-268888)    | 364261 (228950-439977)    |
| Coted Ivoire              | 19320 (13669-29777)  | 42106 (25703-52854)   | 1075619 (769165-1625129)  | 2266383 (1391405-2859164) |
| Djibouti                  | 26 (9-39)            | 46 (22-67)            | 1457 (512-2132)           | 2455 (1174-3596)          |
| Equatorial Guinea         | 249 (172-384)        | 543 (334-683)         | 13874 (9694-20950)        | 29205 (18068-36954)       |
| Eritrea                   | 1039 (574-1425)      | 1807 (1372-2594)      | 57445 (31959-78332)       | 97173 (74554-137973)      |
| Ethiopia                  | 7590 (4781-9892)     | 13325 (10155-17330)   | 419480 (265562-543679)    | 716362 (551120-923152)    |
| Gabon                     | 1187 (849-1822)      | 2555 (1568-3162)      | 66086 (47594-99537)       | 137490 (84797-170919)     |
| The Gambia                | 1395 (841-1931)      | 2554 (1631-3251)      | 77210 (46357-105284)      | 137281 (88351-174924)     |
| Ghana                     | 21435 (15387-32093)  | 44339 (27522-53453)   | 1191668 (860969-1752454)  | 2385402 (1488582-2891071) |
| Guinea                    | 5750 (4370-8312)     | 11585 (7576-13683)    | 319157 (244045-452815)    | 623163 (410053-736792)    |
| Guinea Bissau             | 858 (559-1139)       | 1556 (1079-1956)      | 47456 (30866-61910)       | 83618 (58518-104840)      |
| Kenya                     | 14016 (8894-19235)   | 26144 (16990-33466)   | 776470 (497242-1045551)   | 1406071 (921825-1792232)  |
| Liberia                   | 3386 (2553-5117)     | 7158 (4620-8661)      | 188488 (143212-279509)    | 385123 (249991-468090)    |
| Madagascar                | 14989 (11276-22034)  | 30938 (19879-36961)   | 832756 (629194-1199766)   | 1664773 (1075257-2000739) |
| Malawi                    | 15893 (11553-23921)  | 33145 (20774-40006)   | 884041 (646740-1306027)   | 1783481 (1124041-2163945) |
| Mali                      | 12300 (8813-19000)   | 26814 (16323-33559)   | 684905 (493452-1036974)   | 1443397 (883393-1815510)  |
| Mauritania                | 824 (564-1075)       | 1526 (1124-1903)      | 45605 (31613-58293)       | 82072 (60972-101759)      |
| Mozambique                | 16379 (11435-25037)  | 34998 (21051-43103)   | 911615 (639967-1367281)   | 1883533 (1138354-2330724) |
| Namibia                   | 879 (602-1239)       | 1674 (1079-2050)      | 48706 (33609-67518)       | 90008 (58475-110275)      |
| Niger                     | 12666 (9544-18307)   | 25324 (16527-30002)   | 703196 (533264-997837)    | 1362150 (894458-1615091)  |
| Nigeria                   | 68197 (49553-103387) | 145001 (90003-178077) | 3794265 (2772161-5642850) | 7803130 (4870926-9631307) |
| Rwanda                    | 3997 (1884-5599)     | 7050 (4259-9846)      | 221095 (104267-308464)    | 379111 (230886-527082)    |
| Sao Tome Principe         | 105 (64-165)         | 212 (112-283)         | 5870 (3581-9065)          | 11414 (6029-15146)        |
| Senegal                   | 7169 (4410-9551)     | 12989 (8752-16833)    | 396652 (243604-519117)    | 698223 (474633-901935)    |
| SierraLeone               | 4902 (3574-7367)     | 10319 (6448-12557)    | 272658 (200042-402244)    | 555190 (348927-678933)    |
| Somalia                   | 861 (578-1115)       | 1517 (1294-1921)      | 47466 (32087-61623)       | 81423 (69756-103332)      |
| Sudan North               | 9963 (7013-13100)    | 18692 (14036-22785)   | 551827 (393982-709838)    | 1005300 (761830-1224934)  |
| Sudan South               | 3068 (2393-4043)     | 6056 (4438-7064)      | 170045 (134059-221880)    | 325681 (239709-380589)    |
| Tanzania                  | 35093 (24566-51504)  | 68735 (42426-83808)   | 1948121 (1372835-2812287) | 3697137 (2297256-4509109) |
| Togo                      | 5021 (3743-7483)     | 10508 (6626-12818)    | 279051 (208896-407807)    | 565407 (358743-693618)    |
| Uganda                    | 21775 (11262-35249)  | 49827 (23061-64301)   | 1218693 (632674-1927233)  | 2682882 (1251148-3436707) |
| Zambia                    | 9000 (5948-13668)    | 17702 (10275-22120)   | 500015 (332665-747705)    | 952299 (555949-1189151)   |
| Zimbabwe                  | 3729 (2296-4945)     | 6658 (4789-9082)      | 206245 (127195-272080)    | 357933 (260027-484788)    |

**Additional file 3: Table P8.** Cumulative total events averted (deaths and DALYs) via Extended routine with booster immunisation schedule after 10 years. Events include direct DALYs which are DALYs calculated from direct malaria deaths rather than all deaths.
